# Supplementary material for: Non-pharmaceutical interventions and covid-19 burden in the United States: retrospective, observational cohort study
Source: PubMed Central journal article supplement — BMJ Med. 2022 Aug 1;1(1):e000030. doi: 10.1136/bmjmed-2021-000030 (PMC9978758; doi:10.1136/bmjmed-2021-000030), 2022-08-01
Supplement: bmjmed-2021-000030supp001.pdf [file bmjmed-2021-000030supp001.pdf]

## Supplementary Material

### Table of Contents

|                                                               |       |
|---------------------------------------------------------------|-------|
| Supplementary Text: COVID-19 Natural History Estimations..... | 2     |
| Supplementary Text: Model Phasing.....                        | 3     |
| Supplementary Tables.....                                     | 4-16  |
| Supplementary Figures.....                                    | 17-23 |
| Supplementary Appendix.....                                   | 24-25 |
| Collinearity Diagnostics.....                                 | 26-29 |
| References.....                                               | 30    |

## COVID-19 Natural History Estimations

### *Estimated Time of COVID-19 Infection to Diagnosis*

We used a range 5 to 10 days to estimate time from COVID-19 infection to diagnosis of the case by community laboratory testing. In doing so, we estimated both the time from infection to symptom onset, as well as time from symptom onset to laboratory diagnosis. We estimated the time from COVID-19 infection to symptom onset to be a median of 5 days with interquartile range of 4 to 7 based on aggregate analysis of multiple peer-reviewed publications of confirmed COVID-19 cases in China.<sup>1-7</sup> We then estimated the time from COVID-19 symptom onset to laboratory diagnosis to be a median of 2 days with interquartile range of 1 to 3, factoring in data reported from China<sup>1,3</sup> and limitations in U.S. testing.<sup>8</sup> We also considered that the time from symptom onset to laboratory diagnosis would likely decrease over the duration of the pandemic, based on data describing COVID-19 in China<sup>4,5</sup> and data describing reductions in this time during the severe acute respiratory syndrome epidemic in Hong Kong.<sup>3</sup> Combining the estimations of COVID-19 infection to symptoms and symptoms to diagnosis yield an interquartile range of 5 to 10 days.

### *Estimated Time of COVID-19 Diagnosis to Death*

We used an *a priori* definition of range 6 to 15 days to estimate time from COVID-19 diagnosis to death. This definition was informed by data reported by the Centers for Disease Control and Prevention describing patients who died with COVID-19 in the United States from February 12, 2020 to May 18, 2020.<sup>9</sup> Review of literature reporting time from illness onset to death in China was grossly similar although generally greater time periods.<sup>3,8,10</sup>

## Model Phasing

Phases were aligned with calendar weeks being modeled. These phases were determined subjectively based on total numbers of COVID-19 cases over different periods of the pandemic. Four were used in the presented modeling: (1) March 22, 2020 – June 13, 2020, (2) June 14, 2020 – September 12, 2020, (3) September 13, 2020 – December 12, 2020, and (4) December 12, 2020 – February 12, 2021. These phases agree with chronological patterns in the type of breakpoint (increase vs. decrease in case velocity) over the study period (**Figures S2 and S3**) but are an unverifiable assumption in our models.

**Table S1. Dates of Non-Pharmaceutical Intervention Adoptions and Discontinuations by U.S. State**

| <i>State</i>      | <i>Policy</i>                      | <i>Gathering Ban Level</i> | <i>Date</i> |
|-------------------|------------------------------------|----------------------------|-------------|
| <b>Alabama</b>    | indoor restaurant dining ban (on)  |                            | 03/17/2020  |
|                   | indoor public gathering ban        | mild                       | 03/19/2020  |
|                   | indoor public gathering ban        | severe                     | 03/28/2020  |
|                   | stay at home order (on)            |                            | 04/04/2020  |
|                   | stay at home order (off)           |                            | 04/30/2020  |
|                   | indoor public gathering ban        | no gathering ban           | 05/11/2020  |
|                   | indoor restaurant dining ban (off) |                            | 05/11/2020  |
|                   | public mask mandate (on)           |                            | 07/16/2020  |
| <b>Alaska</b>     | indoor restaurant dining ban (on)  |                            | 03/18/2020  |
|                   | indoor public gathering ban        | severe                     | 03/24/2020  |
|                   | stay at home order (on)            |                            | 03/28/2020  |
|                   | stay at home order (off)           |                            | 04/24/2020  |
|                   | indoor restaurant dining ban (off) |                            | 05/19/2020  |
|                   | indoor public gathering ban        | no gathering ban           | 05/22/2020  |
| <b>Arizona</b>    | indoor public gathering ban        | severe                     | 03/16/2020  |
|                   | indoor restaurant dining ban (on)  |                            | 03/31/2020  |
|                   | stay at home order (on)            |                            | 03/31/2020  |
|                   | indoor restaurant dining ban (off) |                            | 05/11/2020  |
|                   | indoor public gathering ban        | no gathering ban           | 05/12/2020  |
|                   | stay at home order (off)           |                            | 05/15/2020  |
|                   | indoor public gathering ban        | mild                       | 06/29/2020  |
| <b>Arkansas</b>   | indoor restaurant dining ban (on)  |                            | 03/19/2020  |
|                   | indoor public gathering ban        | severe                     | 03/27/2020  |
|                   | indoor public gathering ban        | mild                       | 05/04/2020  |
|                   | indoor restaurant dining ban (off) |                            | 05/11/2020  |
|                   | public mask mandate (on)           |                            | 07/20/2020  |
|                   | indoor public gathering ban        | severe                     | 01/02/2021  |
| <b>California</b> | indoor public gathering ban        | mild                       | 03/11/2020  |
|                   | indoor public gathering ban        | severe                     | 03/19/2020  |
|                   | indoor restaurant dining ban (on)  |                            | 03/19/2020  |
|                   | stay at home order (on)            |                            | 03/19/2020  |
|                   | indoor restaurant dining ban (off) |                            | 05/19/2020  |
|                   | public mask mandate (on)           |                            | 06/18/2020  |
|                   | indoor restaurant dining ban (on)  |                            | 07/13/2020  |

|                    |                                    |                  |            |
|--------------------|------------------------------------|------------------|------------|
|                    | indoor restaurant dining ban (off) |                  | 08/28/2020 |
|                    | stay at home order (off)           |                  | 01/25/2021 |
| <b>Colorado</b>    | indoor public gathering ban        | mild             | 03/13/2020 |
|                    | indoor restaurant dining ban (on)  |                  | 03/17/2020 |
|                    | indoor public gathering ban        | severe           | 03/19/2020 |
|                    | stay at home order (on)            |                  | 03/26/2020 |
|                    | stay at home order (off)           |                  | 04/26/2020 |
|                    | indoor restaurant dining ban (off) |                  | 05/27/2020 |
|                    | public mask mandate (on)           |                  | 07/16/2020 |
| <b>Connecticut</b> | indoor public gathering ban        | mild             | 03/12/2020 |
|                    | indoor restaurant dining ban (on)  |                  | 03/16/2020 |
|                    | stay at home order (on)            |                  | 03/23/2020 |
|                    | indoor public gathering ban        | severe           | 03/26/2020 |
|                    | public mask mandate (on)           |                  | 04/20/2020 |
|                    | stay at home order (off)           |                  | 05/20/2020 |
|                    | indoor public gathering ban        | mild             | 06/17/2020 |
|                    | indoor restaurant dining ban (off) |                  | 06/17/2020 |
| <b>Delaware</b>    | indoor public gathering ban        | mild             | 03/16/2020 |
|                    | indoor restaurant dining ban (on)  |                  | 03/16/2020 |
|                    | stay at home order (on)            |                  | 03/24/2020 |
|                    | indoor public gathering ban        | severe           | 04/02/2020 |
|                    | public mask mandate (on)           |                  | 04/28/2020 |
|                    | stay at home order (off)           |                  | 05/31/2020 |
|                    | indoor restaurant dining ban (off) |                  | 06/01/2020 |
|                    | indoor public gathering ban        | mild             | 06/15/2020 |
|                    | indoor public gathering ban        | severe           | 12/14/2020 |
| <b>Florida</b>     | indoor public gathering ban        | mild             | 03/12/2020 |
|                    | indoor restaurant dining ban (on)  |                  | 03/20/2020 |
|                    | indoor public gathering ban        | severe           | 04/03/2020 |
|                    | stay at home order (on)            |                  | 04/03/2020 |
|                    | stay at home order (off)           |                  | 05/04/2020 |
|                    | indoor restaurant dining ban (off) |                  | 05/18/2020 |
|                    | indoor public gathering ban        | mild             | 06/05/2020 |
|                    | indoor public gathering ban        | no gathering ban | 09/25/2020 |
| <b>Georgia</b>     | indoor public gathering ban        | mild             | 03/19/2020 |
|                    | indoor public gathering ban        | severe           | 03/23/2020 |
|                    | indoor restaurant dining ban (on)  |                  | 04/03/2020 |

|                 |                                    |        |            |
|-----------------|------------------------------------|--------|------------|
|                 | stay at home order (on)            |        | 04/03/2020 |
|                 | indoor restaurant dining ban (off) |        | 04/27/2020 |
|                 | stay at home order (off)           |        | 04/30/2020 |
|                 | indoor public gathering ban        | mild   | 06/01/2020 |
| <b>Hawaii</b>   | indoor restaurant dining ban (on)  |        | 03/17/2020 |
|                 | indoor public gathering ban        | severe | 03/25/2020 |
|                 | stay at home order (on)            |        | 03/25/2020 |
|                 | public mask mandate (on)           |        | 04/25/2020 |
|                 | stay at home order (off)           |        | 05/31/2020 |
|                 | indoor restaurant dining ban (off) |        | 06/05/2020 |
|                 | indoor restaurant dining ban (on)  |        | 08/27/2020 |
|                 | stay at home order (on)            |        | 08/27/2020 |
|                 | indoor restaurant dining ban (off) |        | 09/24/2020 |
|                 | stay at home order (off)           |        | 09/24/2020 |
| <b>Idaho</b>    | indoor public gathering ban        | mild   | 03/16/2020 |
|                 | indoor public gathering ban        | severe | 03/19/2020 |
|                 | indoor restaurant dining ban (on)  |        | 03/25/2020 |
|                 | stay at home order (on)            |        | 03/25/2020 |
|                 | stay at home order (off)           |        | 04/30/2020 |
|                 | indoor restaurant dining ban (off) |        | 05/16/2020 |
| <b>Illinois</b> | indoor public gathering ban        | mild   | 03/12/2020 |
|                 | indoor restaurant dining ban (on)  |        | 03/16/2020 |
|                 | indoor public gathering ban        | severe | 03/21/2020 |
|                 | stay at home order (on)            |        | 03/21/2020 |
|                 | public mask mandate (on)           |        | 05/01/2020 |
|                 | stay at home order (off)           |        | 05/29/2020 |
|                 | indoor public gathering ban        | mild   | 06/26/2020 |
|                 | indoor restaurant dining ban (off) |        | 06/26/2020 |
|                 | indoor restaurant dining ban (on)  |        | 10/22/2020 |
|                 | indoor public gathering ban        | severe | 11/20/2020 |
|                 | indoor public gathering ban        | mild   | 01/15/2021 |
|                 | indoor restaurant dining ban (off) |        | 01/19/2021 |
| <b>Indiana</b>  | indoor public gathering ban        | mild   | 03/12/2020 |
|                 | indoor public gathering ban        | severe | 03/16/2020 |
|                 | indoor restaurant dining ban (on)  |        | 03/16/2020 |
|                 | stay at home order (on)            |        | 03/24/2020 |
|                 | stay at home order (off)           |        | 05/01/2020 |

|                  |                                    |                  |            |
|------------------|------------------------------------|------------------|------------|
|                  | indoor public gathering ban        | mild             | 05/04/2020 |
|                  | indoor restaurant dining ban (off) |                  | 05/11/2020 |
|                  | public mask mandate (on)           |                  | 07/27/2020 |
|                  | indoor public gathering ban        | no gathering ban | 09/26/2020 |
| <b>Iowa</b>      | indoor public gathering ban        | severe           | 03/17/2020 |
|                  | indoor restaurant dining ban (on)  |                  | 03/17/2020 |
|                  | indoor restaurant dining ban (off) |                  | 05/15/2020 |
|                  | indoor public gathering ban        | mild             | 06/01/2020 |
|                  | public mask mandate (on)           |                  | 11/17/2020 |
| <b>Kansas</b>    | indoor public gathering ban        | mild             | 03/16/2020 |
|                  | indoor public gathering ban        | severe           | 03/25/2020 |
|                  | indoor restaurant dining ban (on)  |                  | 03/30/2020 |
|                  | stay at home order (on)            |                  | 03/30/2020 |
|                  | stay at home order (off)           |                  | 05/03/2020 |
|                  | indoor restaurant dining ban (off) |                  | 05/04/2020 |
|                  | indoor public gathering ban        | mild             | 05/22/2020 |
|                  | public mask mandate (on)           |                  | 07/03/2020 |
| <b>Kentucky</b>  | indoor restaurant dining ban (on)  |                  | 03/16/2020 |
|                  | indoor public gathering ban        | mild             | 03/19/2020 |
|                  | indoor public gathering ban        | severe           | 03/25/2020 |
|                  | stay at home order (on)            |                  | 03/26/2020 |
|                  | indoor restaurant dining ban (off) |                  | 05/22/2020 |
|                  | indoor public gathering ban        | mild             | 06/29/2020 |
|                  | stay at home order (off)           |                  | 06/29/2020 |
|                  | public mask mandate (on)           |                  | 07/09/2020 |
|                  | indoor public gathering ban        | severe           | 07/20/2020 |
| <b>Louisiana</b> | indoor public gathering ban        | mild             | 03/12/2020 |
|                  | indoor restaurant dining ban (on)  |                  | 03/16/2020 |
|                  | indoor public gathering ban        | severe           | 03/22/2020 |
|                  | stay at home order (on)            |                  | 03/23/2020 |
|                  | indoor public gathering ban        | mild             | 05/15/2020 |
|                  | indoor restaurant dining ban (off) |                  | 05/15/2020 |
|                  | stay at home order (off)           |                  | 05/15/2020 |
|                  | public mask mandate (on)           |                  | 07/13/2020 |
| <b>Maine</b>     | indoor public gathering ban        | mild             | 03/12/2020 |
|                  | indoor public gathering ban        | severe           | 03/18/2020 |
|                  | indoor restaurant dining ban (on)  |                  | 03/18/2020 |

|                      |                                    |                  |            |
|----------------------|------------------------------------|------------------|------------|
|                      | stay at home order (on)            |                  | 04/02/2020 |
|                      | public mask mandate (on)           |                  | 05/01/2020 |
|                      | indoor restaurant dining ban (off) |                  | 05/18/2020 |
|                      | indoor public gathering ban        | mild             | 05/31/2020 |
|                      | stay at home order (off)           |                  | 05/31/2020 |
| <b>Maryland</b>      | indoor public gathering ban        | mild             | 03/12/2020 |
|                      | indoor restaurant dining ban (on)  |                  | 03/16/2020 |
|                      | indoor public gathering ban        | severe           | 03/19/2020 |
|                      | stay at home order (on)            |                  | 03/30/2020 |
|                      | public mask mandate (on)           |                  | 04/18/2020 |
|                      | stay at home order (off)           |                  | 05/15/2020 |
|                      | indoor restaurant dining ban (off) |                  | 06/12/2020 |
|                      | indoor public gathering ban        | no gathering ban | 09/01/2020 |
|                      | indoor public gathering ban        | severe           | 12/17/2020 |
| <b>Massachusetts</b> | indoor public gathering ban        | mild             | 03/13/2020 |
|                      | indoor restaurant dining ban (on)  |                  | 03/17/2020 |
|                      | indoor public gathering ban        | severe           | 03/24/2020 |
|                      | stay at home order (on)            |                  | 03/24/2020 |
|                      | public mask mandate (on)           |                  | 05/06/2020 |
|                      | stay at home order (off)           |                  | 05/18/2020 |
|                      | indoor restaurant dining ban (off) |                  | 06/22/2020 |
|                      | indoor public gathering ban        | mild             | 07/06/2020 |
|                      | indoor public gathering ban        | severe           | 11/06/2020 |
| <b>Michigan</b>      | indoor public gathering ban        | mild             | 03/13/2020 |
|                      | indoor restaurant dining ban (on)  |                  | 03/16/2020 |
|                      | indoor public gathering ban        | severe           | 03/24/2020 |
|                      | stay at home order (on)            |                  | 03/24/2020 |
|                      | indoor restaurant dining ban (off) |                  | 05/22/2020 |
|                      | stay at home order (off)           |                  | 06/01/2020 |
|                      | indoor public gathering ban        | mild             | 06/10/2020 |
|                      | public mask mandate (on)           |                  | 07/10/2020 |
|                      | public mask mandate (off)          |                  | 10/02/2020 |
|                      | public mask mandate (on)           |                  | 10/05/2020 |
|                      | indoor restaurant dining ban (on)  |                  | 12/09/2020 |
|                      | indoor public gathering ban        | severe           | 12/21/2020 |
| <b>Minnesota</b>     | indoor public gathering ban        | mild             | 03/13/2020 |
|                      | indoor restaurant dining ban (on)  |                  | 03/17/2020 |



|                    |                                    |                  |            |
|--------------------|------------------------------------|------------------|------------|
|                    | indoor public gathering ban        | severe           | 03/26/2020 |
|                    | stay at home order (on)            |                  | 03/27/2020 |
|                    | stay at home order (off)           |                  | 05/17/2020 |
|                    | indoor public gathering ban        | mild             | 05/18/2020 |
|                    | indoor restaurant dining ban (off) |                  | 06/05/2020 |
|                    | public mask mandate (on)           |                  | 07/25/2020 |
|                    | indoor restaurant dining ban (on)  |                  | 11/21/2020 |
|                    | indoor restaurant dining ban (off) |                  | 01/11/2021 |
|                    | indoor public gathering ban        | severe           | 01/13/2021 |
| <b>Mississippi</b> | indoor public gathering ban        | severe           | 03/25/2020 |
|                    | indoor restaurant dining ban (on)  |                  | 04/03/2020 |
|                    | stay at home order (on)            |                  | 04/03/2020 |
|                    | stay at home order (off)           |                  | 04/27/2020 |
|                    | indoor restaurant dining ban (off) |                  | 05/07/2020 |
|                    | indoor public gathering ban        | mild             | 06/01/2020 |
|                    | indoor public gathering ban        | severe           | 07/13/2020 |
|                    | public mask mandate (on)           |                  | 08/05/2020 |
|                    | public mask mandate (off)          |                  | 09/30/2020 |
|                    | public mask mandate (on)           |                  | 10/19/2020 |
| <b>Missouri</b>    | indoor public gathering ban        | mild             | 03/15/2020 |
|                    | indoor public gathering ban        | severe           | 03/23/2020 |
|                    | indoor restaurant dining ban (on)  |                  | 04/06/2020 |
|                    | stay at home order (on)            |                  | 04/06/2020 |
|                    | stay at home order (off)           |                  | 05/03/2020 |
|                    | indoor public gathering ban        | no gathering ban | 05/04/2020 |
|                    | indoor restaurant dining ban (off) |                  | 05/04/2020 |
| <b>Montana</b>     | indoor public gathering ban        | mild             | 03/16/2020 |
|                    | indoor restaurant dining ban (on)  |                  | 03/20/2020 |
|                    | indoor public gathering ban        | severe           | 03/24/2020 |
|                    | stay at home order (on)            |                  | 03/28/2020 |
|                    | stay at home order (off)           |                  | 04/26/2020 |
|                    | indoor restaurant dining ban (off) |                  | 05/04/2020 |
|                    | indoor public gathering ban        | mild             | 06/01/2020 |
|                    | public mask mandate (on)           |                  | 11/17/2020 |
|                    | indoor public gathering ban        | no gathering ban | 01/15/2021 |
| <b>Nebraska</b>    | indoor public gathering ban        | mild             | 03/13/2020 |
|                    | indoor public gathering ban        | severe           | 03/16/2020 |

|                      |                                    |                  |            |
|----------------------|------------------------------------|------------------|------------|
|                      | indoor restaurant dining ban (on)  |                  | 03/19/2020 |
|                      | indoor restaurant dining ban (off) |                  | 05/04/2020 |
|                      | indoor public gathering ban        | mild             | 06/01/2020 |
| <b>Nevada</b>        | indoor restaurant dining ban (on)  |                  | 03/20/2020 |
|                      | indoor public gathering ban        | severe           | 03/24/2020 |
|                      | stay at home order (on)            |                  | 03/31/2020 |
|                      | indoor restaurant dining ban (off) |                  | 05/09/2020 |
|                      | stay at home order (off)           |                  | 05/15/2020 |
|                      | indoor public gathering ban        | mild             | 05/29/2020 |
|                      | public mask mandate (on)           |                  | 06/26/2020 |
| <b>New Hampshire</b> | indoor public gathering ban        | mild             | 03/16/2020 |
|                      | indoor restaurant dining ban (on)  |                  | 03/16/2020 |
|                      | indoor public gathering ban        | severe           | 03/24/2020 |
|                      | stay at home order (on)            |                  | 03/27/2020 |
|                      | indoor public gathering ban        | no gathering ban | 06/15/2020 |
|                      | indoor restaurant dining ban (off) |                  | 06/15/2020 |
|                      | stay at home order (off)           |                  | 06/15/2020 |
|                      | public mask mandate (on)           |                  | 11/20/2020 |
| <b>New Jersey</b>    | indoor public gathering ban        | mild             | 03/16/2020 |
|                      | indoor public gathering ban        | severe           | 03/21/2020 |
|                      | indoor restaurant dining ban (on)  |                  | 03/21/2020 |
|                      | stay at home order (on)            |                  | 03/21/2020 |
|                      | stay at home order (off)           |                  | 06/09/2020 |
|                      | indoor public gathering ban        | mild             | 06/22/2020 |
|                      | public mask mandate (on)           |                  | 07/08/2020 |
|                      | indoor restaurant dining ban (off) |                  | 09/04/2020 |
|                      | indoor public gathering ban        | severe           | 12/07/2020 |
| <b>New Mexico</b>    | indoor public gathering ban        | mild             | 03/12/2020 |
|                      | indoor restaurant dining ban (on)  |                  | 03/19/2020 |
|                      | indoor public gathering ban        | severe           | 03/24/2020 |
|                      | stay at home order (on)            |                  | 03/24/2020 |
|                      | public mask mandate (on)           |                  | 05/16/2020 |
|                      | indoor restaurant dining ban (off) |                  | 06/01/2020 |
|                      | stay at home order (off)           |                  | 06/30/2020 |
|                      | indoor restaurant dining ban (on)  |                  | 07/13/2020 |
|                      | indoor restaurant dining ban (off) |                  | 08/29/2020 |
|                      | stay at home order (on)            |                  | 11/13/2020 |

|                       |                                    |        |            |
|-----------------------|------------------------------------|--------|------------|
|                       | indoor restaurant dining ban (on)  |        | 11/16/2020 |
|                       | stay at home order (off)           |        | 11/30/2020 |
|                       | indoor restaurant dining ban (off) |        | 12/02/2020 |
| <b>New York</b>       | indoor public gathering ban        | mild   | 03/12/2020 |
|                       | indoor restaurant dining ban (on)  |        | 03/16/2020 |
|                       | indoor public gathering ban        | severe | 03/22/2020 |
|                       | stay at home order (on)            |        | 03/22/2020 |
|                       | public mask mandate (on)           |        | 04/17/2020 |
|                       | stay at home order (off)           |        | 05/28/2020 |
|                       | indoor restaurant dining ban (off) |        | 06/12/2020 |
|                       | indoor public gathering ban        | mild   | 06/15/2020 |
|                       | indoor public gathering ban        | severe | 11/11/2020 |
| <b>North Carolina</b> | indoor public gathering ban        | mild   | 03/14/2020 |
|                       | indoor restaurant dining ban (on)  |        | 03/17/2020 |
|                       | indoor public gathering ban        | severe | 03/30/2020 |
|                       | stay at home order (on)            |        | 03/30/2020 |
|                       | indoor restaurant dining ban (off) |        | 05/22/2020 |
|                       | stay at home order (off)           |        | 05/22/2020 |
|                       | public mask mandate (on)           |        | 06/26/2020 |
| <b>North Dakota</b>   | indoor restaurant dining ban (on)  |        | 03/20/2020 |
|                       | indoor restaurant dining ban (off) |        | 05/01/2020 |
|                       | public mask mandate (on)           |        | 11/14/2020 |
|                       | public mask mandate (off)          |        | 01/18/2021 |
| <b>Ohio</b>           | indoor public gathering ban        | mild   | 03/12/2020 |
|                       | indoor restaurant dining ban (on)  |        | 03/15/2020 |
|                       | indoor public gathering ban        | severe | 03/22/2020 |
|                       | stay at home order (on)            |        | 03/23/2020 |
|                       | stay at home order (off)           |        | 05/19/2020 |
|                       | indoor restaurant dining ban (off) |        | 05/21/2020 |
|                       | public mask mandate (on)           |        | 07/23/2020 |
| <b>Oklahoma</b>       | indoor public gathering ban        | severe | 03/24/2020 |
|                       | indoor restaurant dining ban (on)  |        | 03/25/2020 |
|                       | indoor restaurant dining ban (off) |        | 05/01/2020 |
|                       | indoor public gathering ban        | mild   | 05/15/2020 |
|                       | indoor public gathering ban        | mild   | 12/10/2020 |
| <b>Oregon</b>         | indoor public gathering ban        | mild   | 03/12/2020 |
|                       | indoor restaurant dining ban (on)  |        | 03/17/2020 |

|                       |                                    |                  |            |
|-----------------------|------------------------------------|------------------|------------|
|                       | indoor public gathering ban        | severe           | 03/23/2020 |
|                       | stay at home order (on)            |                  | 03/23/2020 |
|                       | indoor public gathering ban        | mild             | 05/15/2020 |
|                       | indoor restaurant dining ban (off) |                  | 05/15/2020 |
|                       | stay at home order (off)           |                  | 06/19/2020 |
|                       | public mask mandate (on)           |                  | 07/01/2020 |
|                       | indoor public gathering ban        | severe           | 07/15/2020 |
|                       | indoor restaurant dining ban (on)  |                  | 11/18/2020 |
|                       | indoor restaurant dining ban (off) |                  | 12/02/2020 |
|                       | indoor public gathering ban        | mild             | 12/18/2020 |
| <b>Pennsylvania</b>   | indoor restaurant dining ban (on)  |                  | 03/16/2020 |
|                       | indoor public gathering ban        | severe           | 03/17/2020 |
|                       | stay at home order (on)            |                  | 04/01/2020 |
|                       | indoor public gathering ban        | mild             | 05/08/2020 |
|                       | indoor restaurant dining ban (off) |                  | 05/29/2020 |
|                       | stay at home order (off)           |                  | 06/04/2020 |
|                       | public mask mandate (on)           |                  | 07/01/2020 |
|                       | indoor public gathering ban        | no gathering ban | 09/22/2020 |
|                       | indoor public gathering ban        | mild             | 10/01/2020 |
|                       | indoor restaurant dining ban (on)  |                  | 12/12/2020 |
|                       | indoor restaurant dining ban (off) |                  | 01/04/2021 |
| <b>Rhode Island</b>   | indoor public gathering ban        | mild             | 03/11/2020 |
|                       | indoor restaurant dining ban (on)  |                  | 03/16/2020 |
|                       | indoor public gathering ban        | severe           | 03/28/2020 |
|                       | stay at home order (on)            |                  | 03/28/2020 |
|                       | public mask mandate (on)           |                  | 05/08/2020 |
|                       | stay at home order (off)           |                  | 05/08/2020 |
|                       | indoor public gathering ban        | mild             | 06/01/2020 |
|                       | indoor restaurant dining ban (off) |                  | 06/01/2020 |
| <b>South Carolina</b> | indoor public gathering ban        | mild             | 03/15/2020 |
|                       | indoor restaurant dining ban (on)  |                  | 03/17/2020 |
|                       | indoor public gathering ban        | severe           | 03/23/2020 |
|                       | stay at home order (on)            |                  | 04/07/2020 |
|                       | stay at home order (off)           |                  | 05/04/2020 |
|                       | indoor restaurant dining ban (off) |                  | 05/11/2020 |
|                       | indoor public gathering ban        | mild             | 06/11/2020 |
| <b>South Dakota</b>   | indoor public gathering ban        | severe           | 03/23/2020 |

|                  |                                    |                  |            |
|------------------|------------------------------------|------------------|------------|
|                  | indoor public gathering ban        | no gathering ban | 04/28/2020 |
| <b>Tennessee</b> | indoor public gathering ban        | mild             | 03/13/2020 |
|                  | indoor public gathering ban        | severe           | 03/22/2020 |
|                  | indoor restaurant dining ban (on)  |                  | 03/23/2020 |
|                  | stay at home order (on)            |                  | 03/31/2020 |
|                  | indoor restaurant dining ban (off) |                  | 04/27/2020 |
|                  | stay at home order (off)           |                  | 04/30/2020 |
|                  | indoor public gathering ban        | mild             | 05/22/2020 |
|                  | indoor public gathering ban        | no gathering ban | 09/29/2020 |
|                  | indoor public gathering ban        | severe           | 12/20/2020 |
| <b>Texas</b>     | indoor restaurant dining ban (on)  |                  | 03/20/2020 |
|                  | indoor public gathering ban        | severe           | 03/21/2020 |
|                  | stay at home order (on)            |                  | 04/02/2020 |
|                  | stay at home order (off)           |                  | 04/30/2020 |
|                  | indoor restaurant dining ban (off) |                  | 05/01/2020 |
|                  | indoor public gathering ban        | mild             | 05/05/2020 |
|                  | public mask mandate (on)           |                  | 07/03/2020 |
| <b>Utah</b>      | indoor public gathering ban        | mild             | 03/16/2020 |
|                  | indoor restaurant dining ban (on)  |                  | 03/18/2020 |
|                  | indoor public gathering ban        | severe           | 03/21/2020 |
|                  | indoor restaurant dining ban (off) |                  | 05/01/2020 |
|                  | indoor public gathering ban        | mild             | 05/16/2020 |
|                  | public mask mandate (on)           |                  | 11/08/2020 |
|                  | indoor public gathering ban        | no gathering ban | 11/24/2020 |
| <b>Vermont</b>   | indoor public gathering ban        | mild             | 03/13/2020 |
|                  | indoor restaurant dining ban (on)  |                  | 03/17/2020 |
|                  | indoor public gathering ban        | severe           | 03/21/2020 |
|                  | stay at home order (on)            |                  | 03/25/2020 |
|                  | stay at home order (off)           |                  | 05/15/2020 |
|                  | indoor public gathering ban        | mild             | 06/01/2020 |
|                  | indoor restaurant dining ban (off) |                  | 06/05/2020 |
|                  | public mask mandate (on)           |                  | 08/01/2020 |
|                  | indoor public gathering ban        | severe           | 11/14/2020 |
| <b>Virginia</b>  | indoor public gathering ban        | mild             | 03/15/2020 |
|                  | indoor restaurant dining ban (on)  |                  | 03/24/2020 |
|                  | indoor public gathering ban        | severe           | 03/25/2020 |
|                  | stay at home order (on)            |                  | 03/30/2020 |

|                      |                                    |                  |            |
|----------------------|------------------------------------|------------------|------------|
|                      | stay at home order (off)           |                  | 05/28/2020 |
|                      | public mask mandate (on)           |                  | 05/29/2020 |
|                      | indoor public gathering ban        | mild             | 06/05/2020 |
|                      | indoor restaurant dining ban (off) |                  | 06/05/2020 |
|                      | indoor public gathering ban        | severe           | 12/14/2020 |
| <b>Washington</b>    | indoor public gathering ban        | mild             | 03/13/2020 |
|                      | indoor restaurant dining ban (on)  |                  | 03/16/2020 |
|                      | indoor public gathering ban        | severe           | 03/23/2020 |
|                      | stay at home order (on)            |                  | 03/23/2020 |
|                      | indoor restaurant dining ban (off) |                  | 05/11/2020 |
|                      | stay at home order (off)           |                  | 05/31/2020 |
|                      | indoor public gathering ban        | mild             | 06/19/2020 |
|                      | public mask mandate (on)           |                  | 06/26/2020 |
|                      | indoor public gathering ban        | severe           | 07/20/2020 |
|                      | indoor public gathering ban        | mild             | 10/13/2020 |
|                      | indoor restaurant dining ban (on)  |                  | 11/18/2020 |
|                      | indoor restaurant dining ban (off) |                  | 01/28/2021 |
| <b>West Virginia</b> | indoor restaurant dining ban (on)  |                  | 03/17/2020 |
|                      | indoor public gathering ban        | severe           | 03/24/2020 |
|                      | stay at home order (on)            |                  | 03/24/2020 |
|                      | stay at home order (off)           |                  | 05/03/2020 |
|                      | indoor restaurant dining ban (off) |                  | 05/21/2020 |
|                      | indoor public gathering ban        | mild             | 05/24/2020 |
|                      | public mask mandate (on)           |                  | 07/07/2020 |
| <b>Wisconsin</b>     | indoor public gathering ban        | mild             | 03/16/2020 |
|                      | indoor public gathering ban        | severe           | 03/17/2020 |
|                      | indoor restaurant dining ban (on)  |                  | 03/17/2020 |
|                      | stay at home order (on)            |                  | 03/25/2020 |
|                      | indoor public gathering ban        | no gathering ban | 05/13/2020 |
|                      | indoor restaurant dining ban (off) |                  | 05/13/2020 |
|                      | stay at home order (off)           |                  | 05/13/2020 |
|                      | public mask mandate (on)           |                  | 08/01/2020 |
|                      | indoor public gathering ban        | severe           | 10/08/2020 |
|                      | indoor public gathering ban        | no gathering ban | 11/10/2020 |
| <b>Wyoming</b>       | indoor public gathering ban        | mild             | 03/13/2020 |
|                      | indoor restaurant dining ban (on)  |                  | 03/19/2020 |
|                      | indoor public gathering ban        | severe           | 03/20/2020 |

---

|                                    |        |            |
|------------------------------------|--------|------------|
| indoor public gathering ban        | mild   | 05/15/2020 |
| indoor restaurant dining ban (off) |        | 05/15/2020 |
| public mask mandate (on)           |        | 12/09/2020 |
| indoor public gathering ban        | severe | 01/02/2021 |

**Table S2. Total Cases & Deaths & Per Capita (100,000) by U.S. State**

| <i>State</i>          | <i>Total Cases</i> | <i>Total Deaths</i> | <i>Cases Per Capita (100,000)</i> | <i>Deaths Per Capita (100,000)</i> |
|-----------------------|--------------------|---------------------|-----------------------------------|------------------------------------|
| <i>Alabama</i>        | 499,819            | 10,148              | 10,226                            | 208                                |
| <i>Alaska</i>         | 56,886             | 305                 | 7,714                             | 41                                 |
| <i>Arizona</i>        | 826,454            | 16,328              | 11,524                            | 228                                |
| <i>Arkansas</i>       | 324,818            | 5,319               | 10,778                            | 176                                |
| <i>California</i>     | 3,501,394          | 54,124              | 8,852                             | 137                                |
| <i>Colorado</i>       | 436,602            | 5,989               | 7,666                             | 105                                |
| <i>Connecticut</i>    | 285,330            | 7,704               | 7,986                             | 216                                |
| <i>Delaware</i>       | 88,354             | 1,473               | 9,135                             | 152                                |
| <i>Florida</i>        | 1,909,209          | 32,266              | 8,964                             | 151                                |
| <i>Georgia</i>        | 1,023,487          | 17,906              | 9,729                             | 170                                |
| <i>Hawaii</i>         | 28,699             | 445                 | 2,020                             | 31                                 |
| <i>Idaho</i>          | 172,931            | 1,879               | 9,858                             | 107                                |
| <i>Illinois</i>       | 1,198,335          | 23,014              | 9,405                             | 181                                |
| <i>Indiana</i>        | 667,262            | 12,737              | 9,971                             | 190                                |
| <i>Iowa</i>           | 282,384            | 5,558               | 8,947                             | 176                                |
| <i>Kansas</i>         | 295,861            | 4,812               | 10,162                            | 165                                |
| <i>Kentucky</i>       | 410,709            | 4,819               | 9,191                             | 108                                |
| <i>Louisiana</i>      | 433,785            | 9,748               | 9,309                             | 209                                |
| <i>Maine</i>          | 45,794             | 706                 | 3,422                             | 53                                 |
| <i>Maryland</i>       | 387,319            | 7,955               | 6,410                             | 132                                |
| <i>Massachusetts</i>  | 591,356            | 16,417              | 8,568                             | 238                                |
| <i>Michigan</i>       | 656,072            | 16,658              | 6,563                             | 167                                |
| <i>Minnesota</i>      | 490,011            | 6,550               | 8,733                             | 117                                |
| <i>Mississippi</i>    | 297,581            | 6,808               | 9,964                             | 228                                |
| <i>Missouri</i>       | 480,643            | 8,161               | 7,845                             | 133                                |
| <i>Montana</i>        | 100,914            | 1,381               | 9,500                             | 130                                |
| <i>Nebraska</i>       | 203,026            | 2,113               | 10,523                            | 110                                |
| <i>Nevada</i>         | 296,190            | 5,037               | 9,761                             | 166                                |
| <i>New Hampshire</i>  | 76,861             | 1,184               | 5,666                             | 87                                 |
| <i>New Jersey</i>     | 812,609            | 23,574              | 9,122                             | 265                                |
| <i>New Mexico</i>     | 186,922            | 3,808               | 8,920                             | 182                                |
| <i>New York</i>       | 1,681,169          | 39,029              | 8,603                             | 200                                |
| <i>North Carolina</i> | 872,176            | 11,502              | 8,400                             | 111                                |
| <i>North Dakota</i>   | 100,391            | 1,478               | 13,208                            | 194                                |
| <i>Ohio</i>           | 978,471            | 17,656              | 8,371                             | 151                                |
| <i>Oklahoma</i>       | 428,997            | 4,534               | 10,880                            | 115                                |
| <i>Oregon</i>         | 157,079            | 2,296               | 3,748                             | 55                                 |
| <i>Pennsylvania</i>   | 948,643            | 24,349              | 7,407                             | 190                                |
| <i>Rhode Island</i>   | 128,781            | 2,547               | 12,180                            | 241                                |
| <i>South Carolina</i> | 525,865            | 8,754               | 10,343                            | 172                                |
| <i>South Dakota</i>   | 113,589            | 1,900               | 12,875                            | 215                                |
| <i>Tennessee</i>      | 782,206            | 11,543              | 11,554                            | 171                                |
| <i>Texas</i>          | 2,686,818          | 44,451              | 9,361                             | 155                                |
| <i>Utah</i>           | 378,850            | 1,976               | 11,985                            | 63                                 |
| <i>Vermont</i>        | 16,083             | 208                 | 2,568                             | 33                                 |
| <i>Virginia</i>       | 585,700            | 9,596               | 6,876                             | 113                                |
| <i>Washington</i>     | 344,532            | 5,041               | 4,572                             | 67                                 |
| <i>West Virginia</i>  | 133,445            | 2,325               | 7,390                             | 129                                |
| <i>Wisconsin</i>      | 621,654            | 7,106               | 10,693                            | 122                                |
| <i>Wyoming</i>        | 54,764             | 682                 | 9,479                             | 118                                |



### Figure S1. Example Graphs of Alabama COVID-19 Case Data Manipulations for the Identification of Breakpoints.

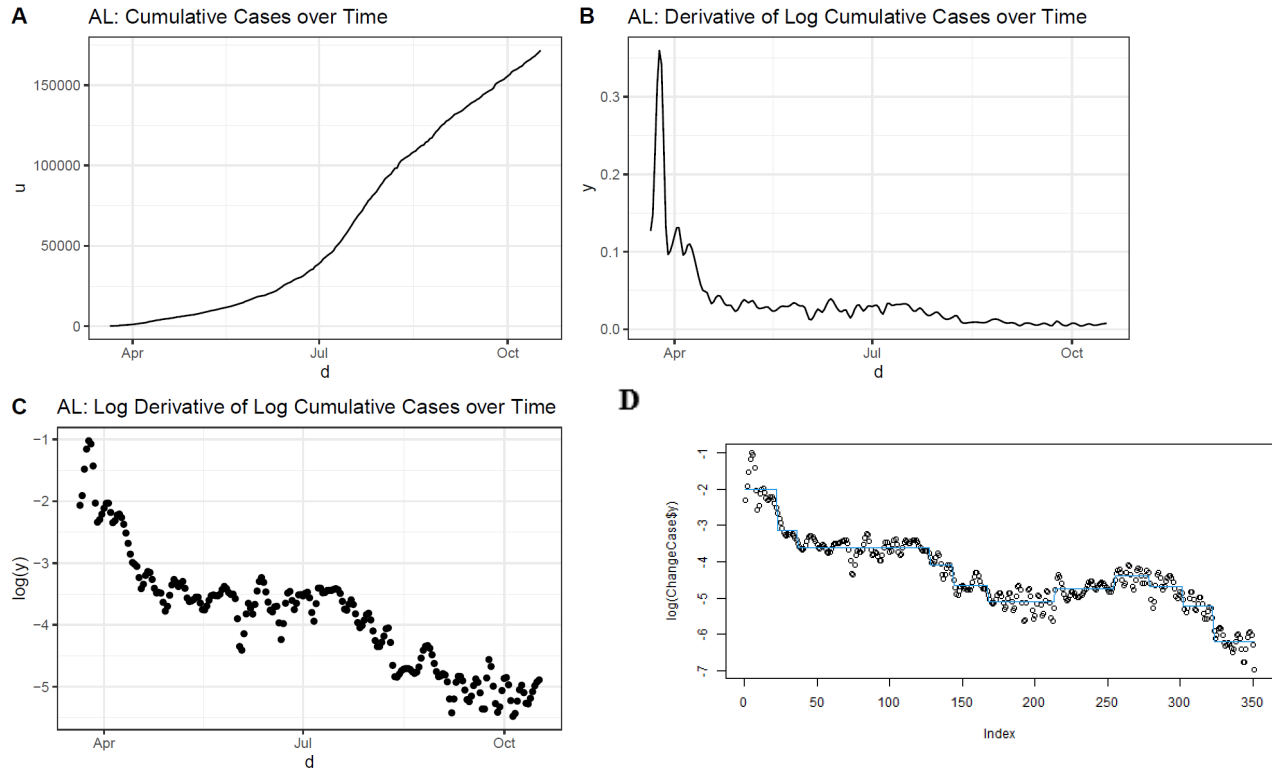

Figure S1(a) shows cumulative cases over time. Figure S1(b) shows the 1<sup>st</sup> derivative of the log of cumulative cases over time, or case velocity. Figure S1(c) shows the log of case velocity, which was mapped to an entire real line for modeling as a linear function in Figure S1(d). Based on this breakpoint approach, Alabama experienced eight decreases and two increases in case velocity.

**Figure S2. Count of State-Level Case Velocity Breakpoints by Week in the United States**

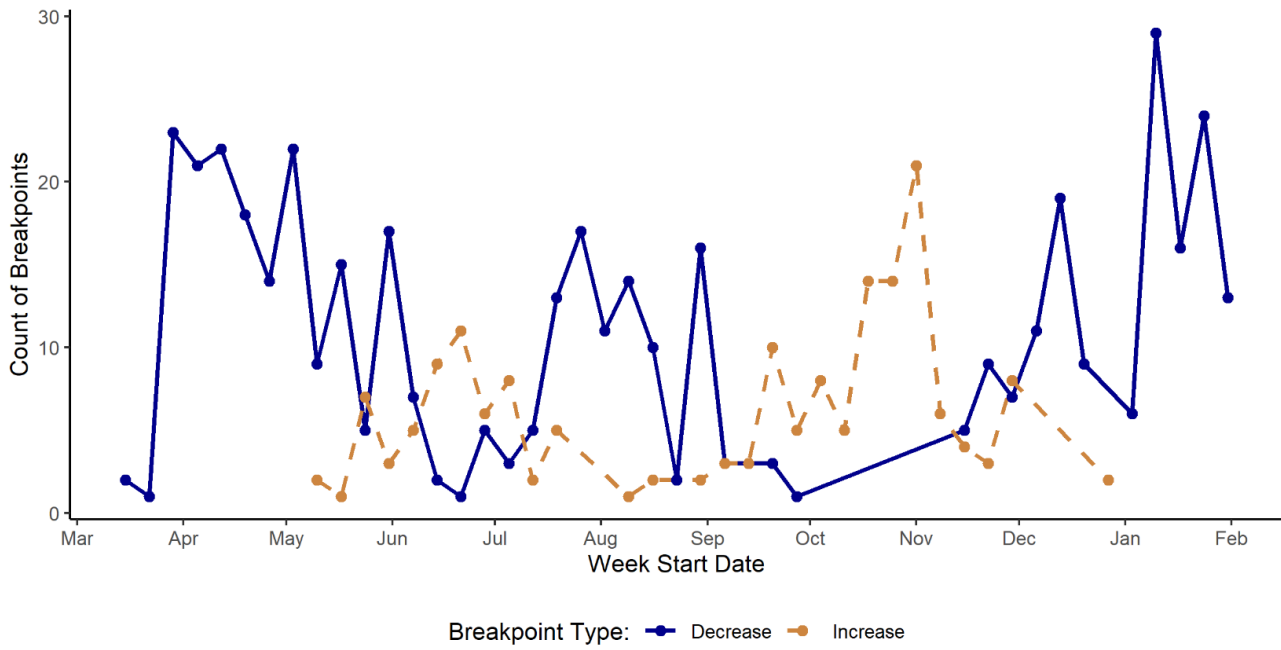

**Figure S3. Count of State-Level Death Velocity Breakpoints by Week in the United States**

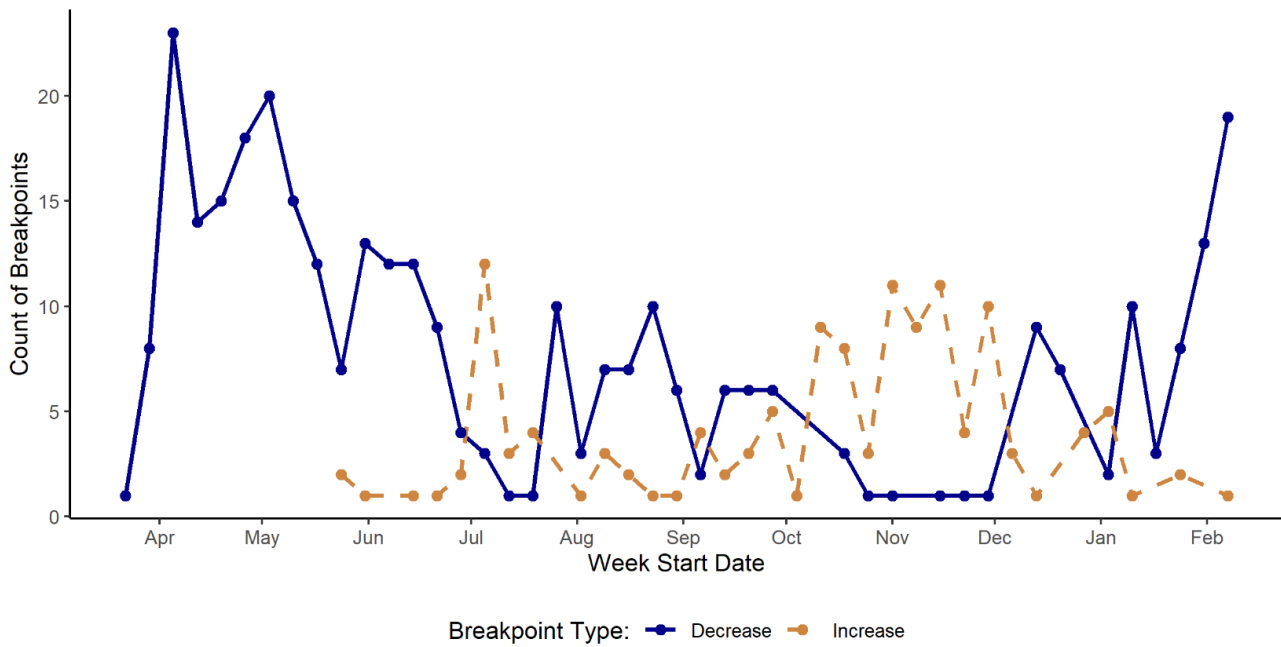

**Figure S4. Derivative of the logarithm of cumulative cases and the breakpoints identified for the top 3 lowest and highest U.S. states by COVID-19 cases per capita**

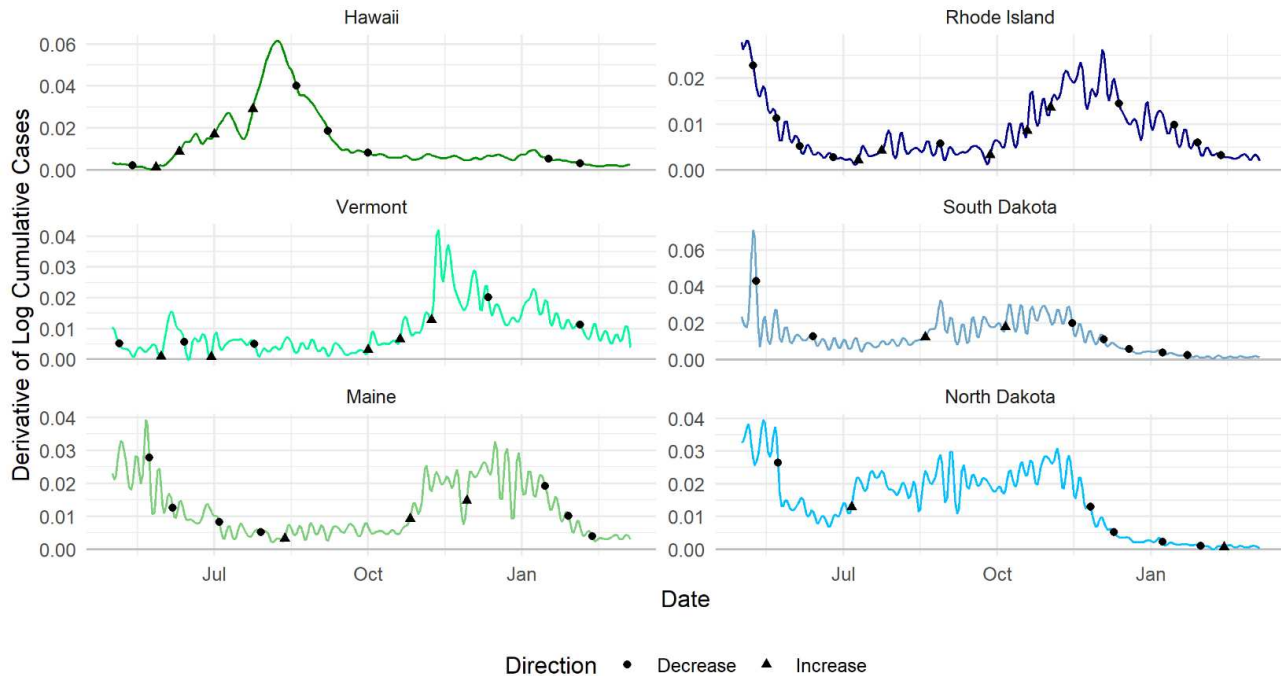

Derivative of the logarithm of cumulative cases most closely represents case velocities graphed.  $Y=0$  for graphs were set as May 1st, 2020 rather than date of first cumulative case due to high initial velocities, pictorially obscuring clinically informative later breakpoints. Hawaii, Vermont, and Maine ranked as the three best performing states by cumulative number of COVID-19 cases per capita as of March 7, 2021. Rhode Island, South Dakota, and North Dakota ranked as the three worst performing states over the same time period. Breakpoints, dates at which the linear segments of COVID-19 case velocities showed substantial change in their rate, are plotted over the liner plot of cases for each respective state.

**Figure S5. Logarithm of the derivative of the logarithm of cumulative cases and the breakpoints identified for the top 3 lowest and highest U.S. states by COVID-19 cases per capita**

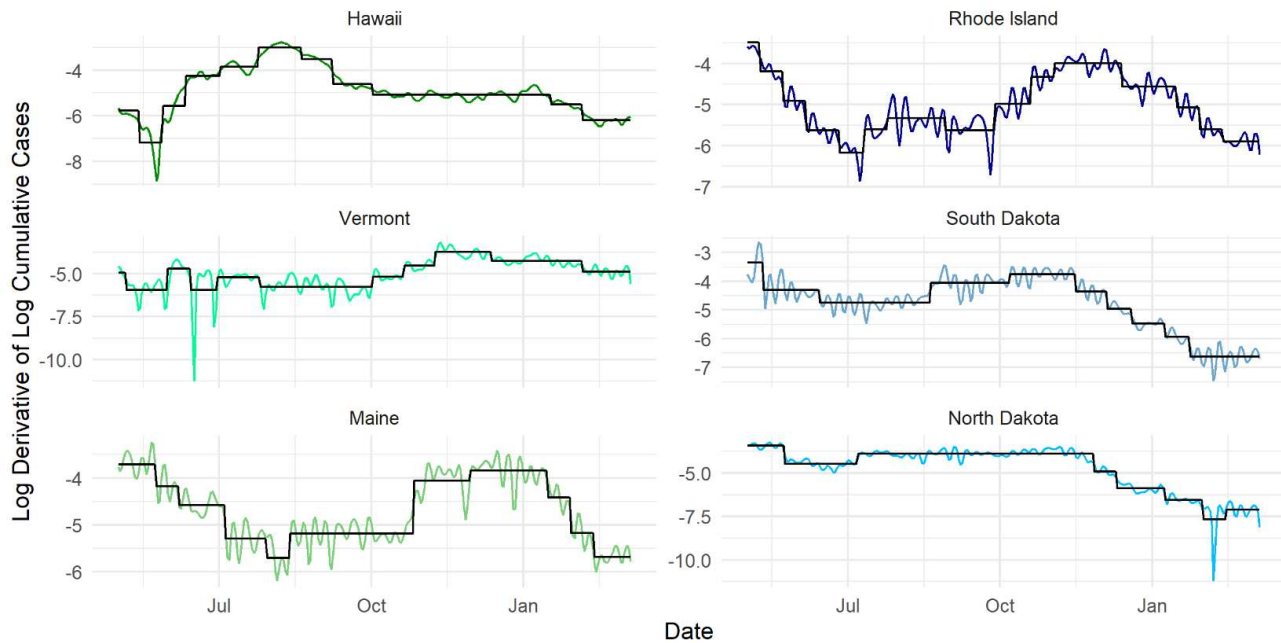

Logarithm of the derivative of the logarithm of cumulative cases most closely represents curation of data implemented to models.  $Y=0$  for graphs were set as May 1st, 2020 rather than date of first cumulative case due to high initial velocities, pictorially obscuring clinically informative later breakpoints. Hawaii, Vermont, and Maine ranked as the three best performing states by cumulative number of COVID-19 cases per capita as of March 7, 2021. Rhode Island, South Dakota, and North Dakota ranked as the three worst performing states over the same time period. Breakpoints, dates at which the linear segments of COVID-19 case velocities showed substantial change in their rate, is fitted over the liner plot of cases for each respective state.

**Figure S6. Cumulative COVID-19 deaths and the breakpoints identified for the top 3 lowest and highest U.S. states by COVID-19 cases per capita**

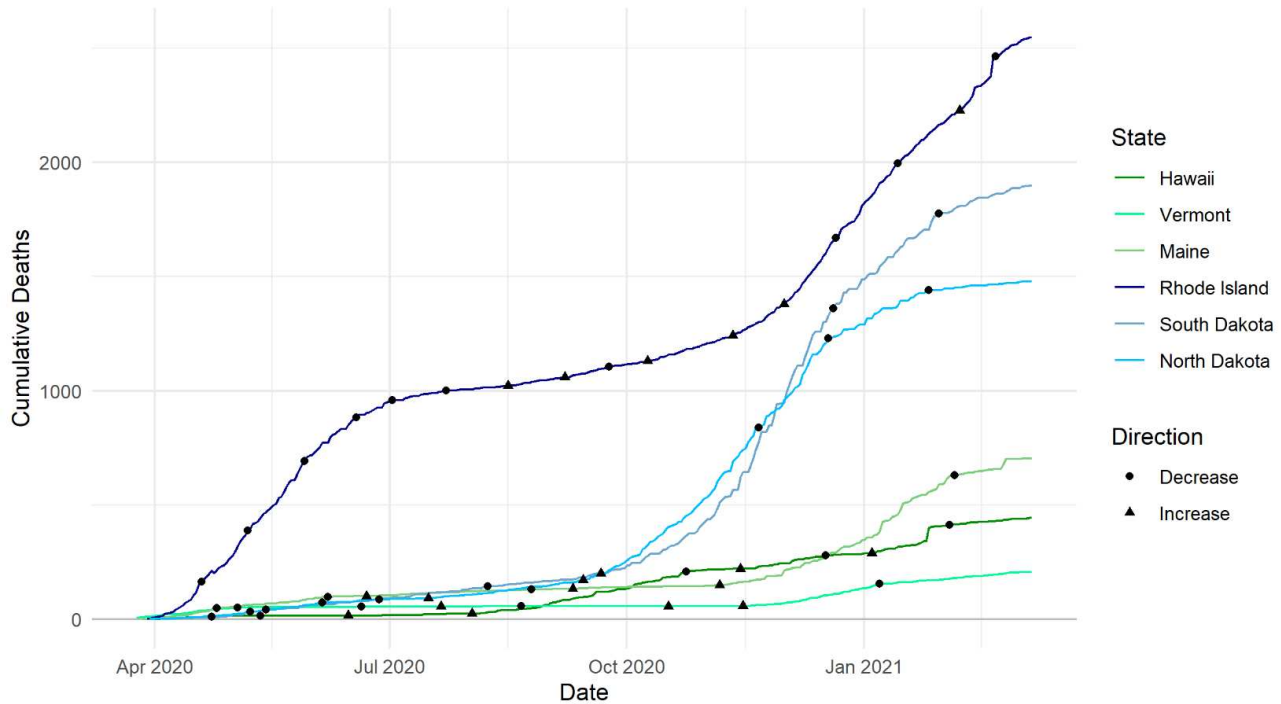

Hawaii, Vermont, and Maine ranked as the three best performing states by cumulative number of COVID-19 cases per capita as of March 7, 2021. Rhode Island, South Dakota, and North Dakota ranked as the three worst performing states over the same time period. Breakpoints, dates at which the linear segments of COVID-19 death velocities showed substantial change in their rate, are plotted over the liner plot of deaths for each respective state.

**Figure S7. Derivative of the logarithm of cumulative deaths and the breakpoints identified for the top 3 lowest and highest U.S. states by COVID-19 cases per capita**

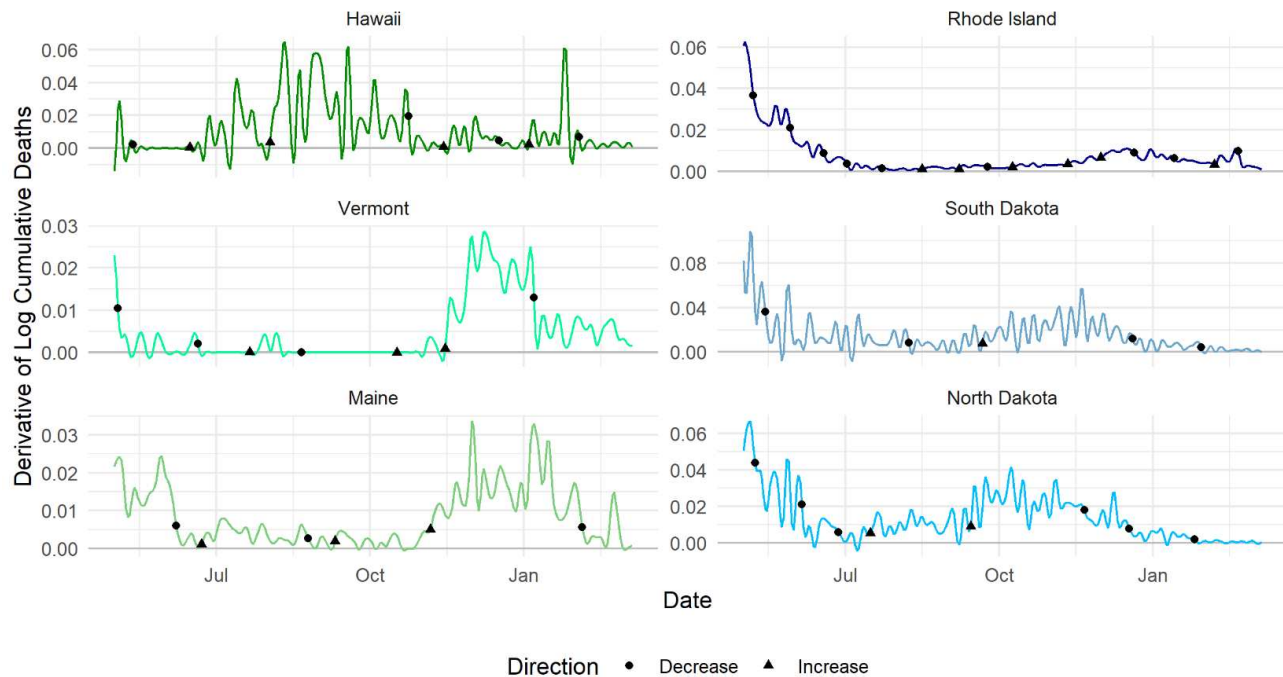

Derivative of the logarithm of cumulative deaths most closely represents case velocities graphed.  $X=0$  for graphs were set as May 1st, 2020 rather than date of first cumulative death due to high initial velocities, pictorially obscuring clinically informative later breakpoints. Hawaii, Vermont, and Maine ranked as the three best performing states by cumulative number of COVID-19 cases per capita as of March 7, 2021. Rhode Island, South Dakota, and North Dakota ranked as the three worst performing states over the same time period. Breakpoints, dates at which the linear segments of COVID-19 death velocities showed substantial change in their rate, are plotted over the liner plot of deaths for each respective state.

**Figure S8. Logarithm of the derivative of the logarithm of cumulative deaths and the breakpoints identified for the top 3 lowest and highest U.S. states by COVID-19 cases per capita**

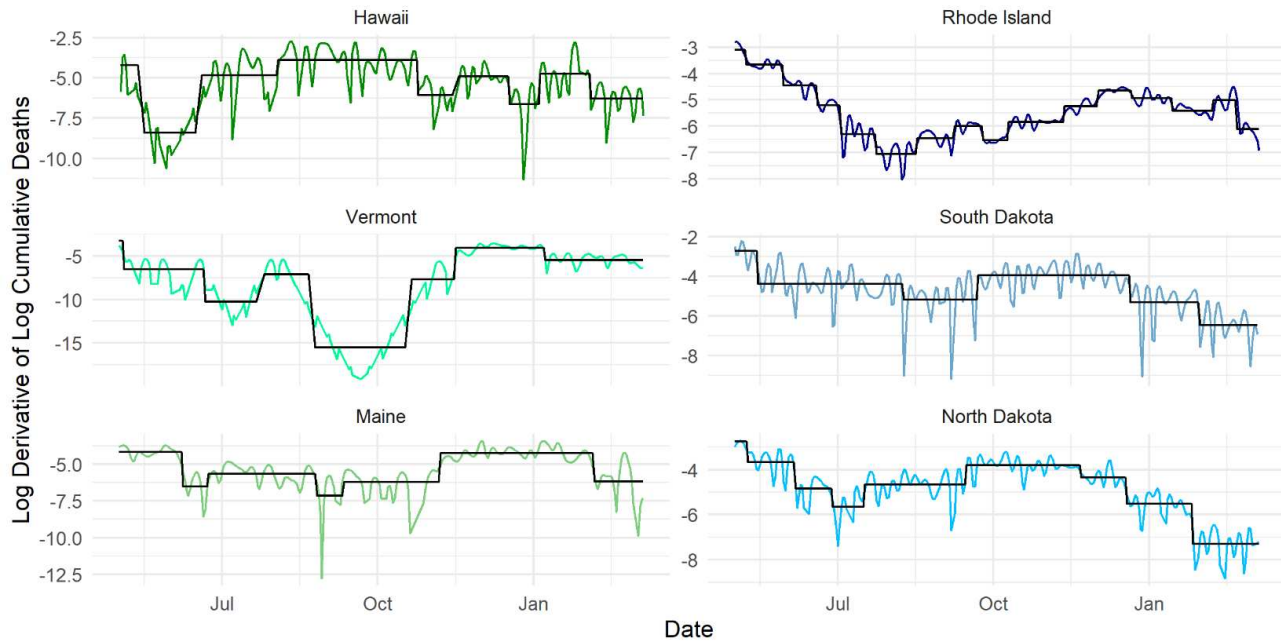

Logarithm of the derivative of the logarithm of cumulative deaths most closely represents curation of data implemented to models.  $X=0$  for graphs were set as May 1st, 2020 rather than date of first cumulative death due to high initial velocities, pictorially obscuring clinically informative later breakpoints. Hawaii, Vermont, and Maine ranked as the three best performing states by cumulative number of COVID-19 cases per capita as of March 7, 2021. Rhode Island, South Dakota, and North Dakota ranked as the three worst performing states over the same time period. Breakpoints, dates at which the linear segments of COVID-19 death velocities showed substantial change in their rate, are plotted over the liner plot of deaths for each respective state.

## Supplementary Appendix

## Sensitivity Analysis: Lag Time

**eTable 1. Association of non-pharmaceutical interventions and the odds of decreasing COVID-19 case and death burden: one model per intervention, examining different potential lag times**

|                                       | Cases |      |            |         | Deaths |      |            |         |
|---------------------------------------|-------|------|------------|---------|--------|------|------------|---------|
|                                       | LT    | OR   | 95% CI     | p-value | LT     | OR   | 95% CI     | p-value |
| Stay at Home Order On                 | 0-21  | 2.02 | 1.63, 2.52 | < .0001 | 7-35   | 2.00 | 1.53, 2.62 | < .0001 |
|                                       | -7-14 | 1.87 | 1.30, 2.68 | .0007   | 0-28   | 1.48 | 1.14, 1.92 | .0030   |
|                                       | 7-28  | 2.51 | 1.77, 3.55 | < .0001 | 14-42  | 2.16 | 1.70, 2.73 | < .0001 |
| Stay at Home Order Off                | 0-21  | 0.87 | 0.53, 1.42 | .5741   | 7-35   | 1.21 | 0.89, 1.63 | .2194   |
|                                       | -7-14 | 1.35 | 0.92, 1.98 | .1294   | 0-28   | 1.16 | 0.86, 1.57 | .3204   |
|                                       | 7-28  | 0.58 | 0.33, 1.00 | .0501   | 14-42  | 1.11 | 0.77, 1.58 | .5815   |
| Indoor Restaurant Dining Ban On       | 0-21  | 1.62 | 1.25, 2.10 | .0003   | 7-35   | 1.50 | 1.15, 1.95 | .0024   |
|                                       | -7-14 | 0.78 | 0.52, 1.19 | .2543   | 0-28   | 1.05 | 0.73, 1.52 | .7824   |
|                                       | 7-28  | 2.60 | 1.92, 3.51 | < .0001 | 14-42  | 2.12 | 1.67, 2.68 | < .0001 |
| Indoor Restaurant Dining Ban Off      | 0-21  | 0.94 | 0.60, 1.45 | .7652   | 7-35   | 1.04 | 0.78, 1.41 | .7641   |
|                                       | -7-14 | 1.44 | 0.97, 2.13 | .0715   | 0-28   | 1.07 | 0.78, 1.45 | .6895   |
|                                       | 7-28  | 0.39 | 0.26, 0.60 | < .0001 | 14-42  | 0.83 | 0.58, 1.20 | .3267   |
| Public Mask Mandate On                | 0-21  | 2.18 | 1.47, 3.23 | .0001   | 7-35   | 1.39 | 0.94, 2.05 | .1015   |
|                                       | -7-14 | 1.75 | 1.16, 2.64 | .0079   | 0-28   | 1.06 | 0.67, 1.66 | .8094   |
|                                       | 7-28  | 2.71 | 1.83, 4.00 | < .0001 | 14-42  | 1.84 | 1.29, 2.62 | .0008   |
| Mild Indoor Public Gathering Ban On   | 0-21  | 0.51 | 0.39, 0.68 | < .0001 | 7-35   | 0.86 | 0.62, 1.18 | .3405   |
|                                       | -7-14 | 0.49 | 0.33, 0.72 | .0003   | 0-28   | 0.87 | 0.68, 1.10 | .2446   |
|                                       | 7-28  | 0.77 | 0.57, 1.04 | .0859   | 14-42  | 1.07 | 0.80, 1.42 | .6610   |
| Severe Indoor Public Gathering Ban On | 0-21  | 1.68 | 1.31, 2.16 | < .0001 | 7-35   | 1.45 | 1.12, 1.88 | .0044   |
|                                       | -7-14 | 1.06 | 0.73, 1.54 | .7645   | 0-28   | 1.01 | 0.77, 1.31 | .9686   |
|                                       | 7-28  | 2.42 | 1.82, 3.22 | < .0001 | 14-42  | 1.67 | 1.30, 2.16 | < .0001 |
| Indoor Public Gathering Ban Off       | 0-21  | 0.64 | 0.29, 1.40 | .2683   | 7-35   | 1.19 | 0.65, 2.19 | .5728   |
|                                       | -7-14 | 0.80 | 0.44, 1.45 | .4584   | 0-28   | 1.10 | 0.61, 2.00 | .7440   |
|                                       | 7-28  | 0.61 | 0.26, 1.45 | .2658   | 14-42  | 1.27 | 0.63, 2.55 | .5104   |

LT = lag time expressed as a range of days. OR = odds ratio. CI = confidence interval. A lag time of 0-21 for cases and 7-35 for deaths was our base assumption model based on literature review, reported in **Table 2**. A lag time of 7-35 indicates that, for a given week, the policy window considered lies between 7 and 35 days before the first day of the week. A lag time of -7-14 indicates that, for a given week, the policy window considered lies between the last day of the week and 14 days before the first day of the week. An odds ratio greater than one is associated with an increased probability that COVID-19 case or death velocities decreased. We evaluated each NPI in an individual model. We classified indoor public gathering bans with a maximum of 10 or fewer as severe, and indoor public gathering bans with maximums greater than 10 as mild. Indoor restaurant dining ban was defined as adopted when indoor dining was banned and discontinued when indoor dining was reinstated, regardless of capacity specification or outdoor dining policies.

Stay at home order remained highly significantly associated with decreased case and death velocities regardless of lag time chosen. The association between enactment of a public mask mandate and decrease in case velocity was strongest for the most distal lag time, and this was the only statistically significant lag time when examining association with death velocity. Indoor restaurant dining ban was significantly associated with decreased case and death velocities when using the original lag time and the more distal lag time, but not the more proximal lag time. Severe indoor public gathering ban was significantly associated with decreased case and death velocities when using the original lag time and the more distal lag time, but not the more proximal lag time.



**eTable 2. Association of non-pharmaceutical interventions and the odds of decreasing COVID-19 case and death burden: one model including all interventions, examining different potential lag times**

|                                       | Cases |      |            |                   | Deaths |      |            |              |
|---------------------------------------|-------|------|------------|-------------------|--------|------|------------|--------------|
|                                       | LT    | AOR  | 95% CI     | p-value           | LT     | AOR  | 95% CI     | p-value      |
| Stay at Home Order On                 | 0-21  | 1.47 | 1.04, 2.07 | <b>.0284</b>      | 7-35   | 1.89 | 1.25, 2.87 | <b>.0027</b> |
|                                       | -7-14 | 2.28 | 1.44, 3.62 | <b>.0004</b>      | 0-28   | 1.68 | 1.17, 2.42 | <b>.0052</b> |
|                                       | 7-28  | 1.25 | 0.76, 2.04 | .3778             | 14-42  | 1.58 | 1.11, 2.24 | <b>.0116</b> |
| Stay at Home Order Off                | 0-21  | 0.93 | 0.56, 1.55 | .7911             | 7-35   | 1.28 | 0.89, 1.85 | .1850        |
|                                       | -7-14 | 1.26 | 0.82, 1.93 | .2854             | 0-28   | 1.18 | 0.84, 1.64 | .3405        |
|                                       | 7-28  | 0.83 | 0.48, 1.43 | .5014             | 14-42  | 1.28 | 0.86, 1.91 | .2236        |
| Indoor Restaurant Dining Ban On       | 0-21  | 1.47 | 0.96, 2.26 | .0731             | 7-35   | 1.15 | 0.76, 1.74 | .5024        |
|                                       | -7-14 | 0.77 | 0.47, 1.28 | .3180             | 0-28   | 0.96 | 0.58, 1.59 | .8809        |
|                                       | 7-28  | 2.05 | 1.22, 3.45 | <b>.0066</b>      | 14-42  | 1.74 | 1.15, 2.63 | <b>.0088</b> |
| Indoor Restaurant Dining Ban Off      | 0-21  | 1.25 | 0.77, 2.03 | .3654             | 7-35   | 1.13 | 0.81, 1.59 | .4781        |
|                                       | -7-14 | 1.70 | 1.11, 2.61 | <b>.0147</b>      | 0-28   | 1.09 | 0.77, 1.52 | .6358        |
|                                       | 7-28  | 0.51 | 0.32, 0.81 | <b>.0045</b>      | 14-42  | 0.92 | 0.60, 1.43 | .7142        |
| Public Mask Mandate On                | 0-21  | 2.27 | 1.51, 3.41 | <b>&lt; .0001</b> | 7-35   | 1.45 | 0.97, 2.17 | .0670        |
|                                       | -7-14 | 1.84 | 1.22, 2.78 | <b>.0036</b>      | 0-28   | 1.07 | 0.68, 1.69 | .7564        |
|                                       | 7-28  | 2.68 | 1.78, 4.04 | <b>&lt; .0001</b> | 14-42  | 1.95 | 1.35, 2.82 | <b>.0004</b> |
| Mild Indoor Public Gathering Ban On   | 0-21  | 0.46 | 0.34, 0.61 | <b>&lt; .0001</b> | 7-35   | 0.78 | 0.56, 1.09 | .1480        |
|                                       | -7-14 | 0.47 | 0.32, 0.71 | <b>.0003</b>      | 0-28   | 0.85 | 0.65, 1.12 | .2430        |
|                                       | 7-28  | 0.65 | 0.46, 0.92 | <b>.0143</b>      | 14-42  | 0.90 | 0.65, 1.23 | .4964        |
| Severe Indoor Public Gathering Ban On | 0-21  | 1.38 | 0.97, 1.95 | .0738             | 7-35   | 1.08 | 0.72, 1.64 | .6924        |
|                                       | -7-14 | 0.99 | 0.62, 1.57 | .9604             | 0-28   | 0.87 | 0.60, 1.24 | .4303        |
|                                       | 7-28  | 1.73 | 1.20, 2.51 | <b>.0036</b>      | 14-42  | 1.07 | 0.74, 1.56 | .7148        |
| Indoor Public Gathering Ban Off       | 0-21  | 0.64 | 0.30, 1.39 | .2608             | 7-35   | 1.16 | 0.62, 2.17 | .6426        |
|                                       | -7-14 | 0.67 | 0.38, 1.21 | .1840             | 0-28   | 1.05 | 0.58, 1.92 | .8687        |
|                                       | 7-28  | 0.81 | 0.33, 1.96 | .6364             | 14-42  | 1.38 | 0.68, 2.81 | .3770        |

LT = lag time expressed as a range of days. AOR = adjusted odds ratio. CI = confidence interval. A lag time of 0-21 for cases and 7-35 for deaths was our base assumption model based on literature review, reported in **Table 3**. A lag time of 7-35 indicates that, for a given week, the policy window considered lies between 7 and 35 days before the first day of the week. A lag time of -7-14 indicates that, for a given week, the policy window considered lies between the last day of the week and 14 days before the first day of the week. An adjusted odds ratio greater than 1 is associated with increased probability that COVID-19 case or death velocities decreased. We included all four NPIs as covariates in this model. We classified indoor public gathering bans with a maximum of 10 or fewer as severe, and indoor public gathering bans with maximums greater than 10 as mild. Indoor restaurant dining ban was defined as adopted when indoor dining was banned and discontinued when indoor dining was reinstated, regardless of capacity specification or outdoor dining policies.

Stay at home order was most strongly associated with decreased case and death velocities for the two more proximal lag times vs. the distal lag times. Although adoption of indoor restaurant dining bans were not significant in the adjusted models when using the original lag time, they were significantly associated with decreased case and death velocity when using the more distal lag time. For this same distal lag time, discontinuation of indoor dining bans was significantly associated with an increase in case velocity. In adjusted models, public mask mandates were significantly associated with decreased case velocity across all three lag times and decreased death velocity for the most distal lag time. Mild indoor public gathering bans were associated with increased case velocity across all three lag times. Severe indoor public gathering bans were associated with decreased case velocity for only the most distal lag time.

## Collinearity Diagnostics

### Case Model

- For generalized linear models, collinearity of predictors is a concern in such that it could potentially lead to an ill-conditioned weighted information matrix (but does not necessarily), which can cause inflation of standard errors associated with model parameters thereby impacted inferences.
- We assess the potential impact of collinearity by examining the correlation matrix for the estimated parameters and looking for large correlations.
- We also use PROC REG to generate collinearity diagnostics (Condition Indices) for the set of predictors
- For the case model, both steps indicated that collinearity was not likely to be a problem. High correlation existed only between the two intercepts, and the parameters corresponding to the week number/splines. These high correlations (> 0.60 in absolute magnitude) are to be expected and are not cause for concern.

### Correlation Matrix among Estimated Parameters

#### Estimated Correlation Matrix

|                | Intercept1 | Intercept2 | Prm1    | Prm3    | Prm5    | Prm7    | Prm9    | Prm11   | Prm13   | Prm15   | Prm17   | Prm18   | Prm19   | Prm20   |
|----------------|------------|------------|---------|---------|---------|---------|---------|---------|---------|---------|---------|---------|---------|---------|
| Intercept1     | 1.0000     | 0.9841     | -0.2036 | -0.3037 | -0.0305 | -0.2454 | -0.4497 | -0.1436 | -0.0420 | -0.5839 | -0.2916 | 0.3348  | -0.2136 | 0.0436  |
| Intercept2     |            | 1.0000     | -0.2022 | -0.2967 | -0.0375 | -0.2461 | -0.4612 | -0.1195 | -0.0466 | -0.5669 | -0.2978 | 0.3251  | -0.1947 | 0.0700  |
| HOME_ON        |            |            | 1.0000  | 0.0263  | -0.3039 | 0.0324  | 0.0201  | 0.0890  | -0.3349 | -0.0038 | -0.0780 | 0.0261  | 0.0195  | 0.0031  |
| HOME_OFF       |            |            |         | 1.0000  | -0.0109 | -0.2899 | -0.0219 | -0.0187 | 0.0328  | -0.0665 | 0.1305  | -0.1798 | 0.1480  | -0.0393 |
| RESTAURANT_ON  |            |            |         |         | 1.0000  | 0.0290  | 0.0275  | -0.2128 | -0.2812 | 0.0030  | -0.2398 | 0.1961  | -0.0456 | -0.0486 |
| RESTAURANT_OFF |            |            |         |         |         | 1.0000  | 0.1079  | -0.1275 | -0.0200 | -0.1158 | 0.2119  | -0.2449 | 0.1567  | -0.0111 |
| MASK_ON        |            |            |         |         |         |         | 1.0000  | -0.0046 | 0.0064  | 0.0067  | 0.1216  | -0.1228 | 0.0469  | -0.0376 |
| MILD_ON        |            |            |         |         |         |         |         | 1.0000  | -0.0447 | 0.0262  | -0.1066 | 0.0290  | 0.0487  | 0.0225  |
| SEVERE_ON      |            |            |         |         |         |         |         |         | 1.0000  | 0.0168  | -0.1354 | 0.0993  | -0.0004 | 0.0140  |
| NONE_ON        |            |            |         |         |         |         |         |         |         | 1.0000  | -0.0223 | 0.0296  | -0.0241 | 0.0148  |
| WKNUM          |            |            |         |         |         |         |         |         |         |         | 1.0000  | -0.9257 | 0.4248  | -0.0908 |
| WKNUM_SPLINE1  |            |            |         |         |         |         |         |         |         |         |         | 1.0000  | -0.6966 | 0.2084  |
| WKNUM_SPLINE2  |            |            |         |         |         |         |         |         |         |         |         |         | 1.0000  | -0.6306 |
| WKNUM_SPLINE3  |            |            |         |         |         |         |         |         |         |         |         |         |         | 1.0000  |

**Collinearity Diagnostics (CASE MODEL)**

- Condition Indices produced by PROC REG using an identical set of predictors were all below 40, suggesting collinearity is not likely to be a concern. The highest condition index equals 39.1 with high variance proportions for week number and week number spline 1, which indicates there may be some collinearity among these predictors which is to be expected and not cause for concern. The second highest index equals only 11.9 and is certainly not concerning.

| Number | Eigenvalue | Condition Index |
|--------|------------|-----------------|
| 1      | 4.20052    | 1               |
| 2      | 2.34328    | 1.33887         |
| 3      | 1.61264    | 1.61392         |
| 4      | 1.03589    | 2.0137          |
| 5      | 0.92576    | 2.13011         |
| 6      | 0.74208    | 2.37918         |
| 7      | 0.5925     | 2.66261         |
| 8      | 0.55769    | 2.74444         |
| 9      | 0.40956    | 3.20251         |
| 10     | 0.38422    | 3.30645         |
| 11     | 0.16361    | 5.06697         |
| 12     | 0.0295     | 11.93375        |
| 13     | 0.00274    | 39.14931        |

*Death Model*

For the death model, both steps described previously for case model were followed and they indicated that collinearity was not likely to be of concern. High correlation existed only between the two intercepts, and the parameters corresponding to the week number/splines. These high correlations (> 0.60 in absolute magnitude) are to be expected and are not cause for concern.

## Correlation Matrix among Estimated Parameters

**Estimated Correlation Matrix**

|                | Intercept1 | Intercept2 | Prm1    | Prm3    | Prm5    | Prm7    | Prm9    | Prm11   | Prm13   | Prm15   | Prm17   | Prm18   | Prm19   | Prm20   |
|----------------|------------|------------|---------|---------|---------|---------|---------|---------|---------|---------|---------|---------|---------|---------|
| Intercept1     | 1.0000     | 0.9750     | -0.1917 | -0.3106 | 0.0062  | -0.2886 | -0.4852 | -0.0928 | -0.0124 | -0.5566 | -0.4456 | 0.4765  | -0.2811 | 0.0623  |
| Intercept2     |            | 1.0000     | -0.1904 | -0.3055 | 0.0015  | -0.2815 | -0.4831 | -0.0830 | -0.0144 | -0.5392 | -0.4329 | 0.4442  | -0.2716 | 0.1382  |
| HOME_ON        |            |            | 1.0000  | 0.0534  | -0.3460 | 0.0585  | 0.0204  | 0.0422  | -0.3611 | -0.0012 | 0.0063  | -0.0550 | 0.0707  | -0.0201 |
| HOME_OFF       |            |            |         | 1.0000  | -0.0175 | -0.2799 | -0.0086 | -0.0292 | 0.0296  | -0.0689 | 0.1933  | -0.2406 | 0.1811  | -0.0476 |
| RESTAURANT_ON  |            |            |         |         | 1.0000  | 0.0156  | 0.0457  | -0.1860 | -0.2873 | -0.0021 | -0.2607 | 0.2099  | -0.0365 | -0.0526 |
| RESTAURANT_OFF |            |            |         |         |         | 1.0000  | 0.1237  | -0.1685 | -0.0078 | -0.1284 | 0.2867  | -0.3153 | 0.1880  | -0.0068 |
| MASK_ON        |            |            |         |         |         |         | 1.0000  | 0.0067  | -0.0151 | 0.0225  | 0.1259  | -0.1189 | 0.0274  | -0.0195 |
| MILD_ON        |            |            |         |         |         |         |         | 1.0000  | -0.0489 | 0.0603  | -0.1233 | 0.0615  | 0.0107  | 0.0251  |
| SEVERE_ON      |            |            |         |         |         |         |         |         | 1.0000  | 0.0146  | -0.1423 | 0.1038  | -0.0043 | 0.0357  |
| NONE_ON        |            |            |         |         |         |         |         |         |         | 1.0000  | 0.0038  | -0.0069 | 0.0203  | -0.0216 |
| WKNUM          |            |            |         |         |         |         |         |         |         |         | 1.0000  | -0.9326 | 0.4314  | -0.0818 |
| WKNUM_SPLINE1  |            |            |         |         |         |         |         |         |         |         |         | 1.0000  | -0.6854 | 0.1752  |
| WKNUM_SPLINE2  |            |            |         |         |         |         |         |         |         |         |         |         | 1.0000  | -0.6194 |
| WKNUM_SPLINE3  |            |            |         |         |         |         |         |         |         |         |         |         |         | 1.0000  |

**Collinearity Diagnostics (DEATH MODEL)**

- Condition Indices produced by PROC REG using an identical set of predictors were all below 50, suggesting collinearity is not likely to be a concern. The highest condition index equals 46.7 with high variance proportions for week number and week number spline 1, which indicates there may be some collinearity among these predictors which is to be expected and not cause for concern. The second highest index equals only 13.2 and is certainly not concerning.

| Number | Eigenvalue | Condition Index |
|--------|------------|-----------------|
| 1      | 4.33054    | 1               |
| 2      | 2.4818     | 1.32095         |
| 3      | 1.67492    | 1.60796         |
| 4      | 1.02688    | 2.05358         |
| 5      | 0.92298    | 2.16608         |
| 6      | 0.66258    | 2.55654         |
| 7      | 0.53998    | 2.83193         |
| 8      | 0.49791    | 2.94913         |
| 9      | 0.36727    | 3.43381         |
| 10     | 0.33096    | 3.61727         |
| 11     | 0.13725    | 5.61713         |
| 12     | 0.02492    | 13.18171        |
| 13     | 0.00198    | 46.72029        |

### Supplemental References

1. Lauer SA, Grantz KH, Bi Q, et al. The incubation period of coronavirus disease 2019 (CoVID-19) from publicly reported confirmed cases: Estimation and application. *Ann Intern Med.* 2020;172(9):577-582. doi:10.7326/M20-0504
2. Guan W, Ni Z, Hu Y, et al. Clinical characteristics of coronavirus disease 2019 in China. *N Engl J Med.* 2020;382(18):1708-1720. doi:10.1056/NEJMoa2002032
3. Linton NM, Kobayashi T, Yang Y, et al. Incubation Period and Other Epidemiological Characteristics of 2019 Novel Coronavirus Infections with Right Truncation: A Statistical Analysis of Publicly Available Case Data. *J Clin Med.* 2020;9(2):538. doi:10.3390/jcm9020538
4. Li Q, Guan X, Wu P, et al. Early transmission dynamics in Wuhan, China, of novel coronavirus-infected pneumonia. *N Engl J Med.* 2020;382(13):1199-1207. doi:10.1056/NEJMoa2001316
5. Tian S, Hu N, Lou J, et al. Characteristics of COVID-19 infection in Beijing. *J Infect.* 2020;80(4):401-406. doi:10.1016/j.jinf.2020.02.018
6. Chan JFW, Yuan S, Kok KH, et al. A familial cluster of pneumonia associated with the 2019 novel coronavirus indicating person-to-person transmission: a study of a family cluster. *Lancet.* 2020;395(10223):514-523. doi:10.1016/S0140-6736(20)30154-9
7. Berlin DA, Gulick RM, Martinez FJ. Severe Covid-19. *N Engl J Med.* Published online 2020:1-10. doi:10.1056/nejmcp2009575
8. Cheng MP, Papenburg J, Desjardins M, et al. Diagnostic Testing for Severe Acute Respiratory Syndrome-Related Coronavirus 2: A Narrative Review. *Ann Intern Med.* 2020;172(11):726-734. doi:10.7326/M20-1301
9. May F, Wortham JM, Lee JT, et al. Characteristics of Persons Who Died with COVID-19 — United States ,. 2020;69(28):923-929.
10. Gralinski LE, Menachery VD. Return of the coronavirus: 2019-nCoV. *Viruses.* 2020;12(2):1-8. doi:10.3390/v12020135
